# Supplementary material for: Representing Variability: The Case of Life Cycle Diagrams
Source: Atypon-hosted journal article supplement (doi:10.1187/cbe.19-11-0251), 2020-09-01

# **Supplemental Material**

*CBE—Life Sciences Education*

Menendez *et al.*

## Appendix A

| <b>Book Title</b>                        | <b>Year</b> | <b>Author(s)</b>                                   | <b>Illustrator(s)</b>                                                              | <b>Book type</b> | <b>Intended Grade</b> | <b>Number of Life Cycle Diagrams</b> |
|------------------------------------------|-------------|----------------------------------------------------|------------------------------------------------------------------------------------|------------------|-----------------------|--------------------------------------|
| A Ladybug's Life                         | 2001        | John Himmelman                                     | John Himmelman                                                                     | Trade book       | K through 2nd         | 0                                    |
| A Pill Bug's Life                        | 2000        | John Himmelman                                     | John Himmelman                                                                     | Trade book       | K through 2nd         | 0                                    |
| A Salamander's Life                      | 1998        | John Himmelman                                     | John Himmelman                                                                     | Trade book       | 1st through 2nd       | 0                                    |
| Animal Life Cycles: growing and changing | 2006        | Bobbie Kalman                                      | Barbara Bedell, Katherine Kantor, Bonna Rouse, Margaret Amy Salter, Tiffany Wybouw | Trade book       | 2nd through 3rd       | 12                                   |
| BSCS Green Version: High School Biology  | 1964        | Rand McNally & Company                             | N/A                                                                                | Textbook         | High school           | 1                                    |
| Biology 2nd Edition                      | 1993        | Bernice Essensfeld, Carol Gontang, Randy Moore     | N/A                                                                                | Textbook         | College               | 2                                    |
| Biology Exploring Life                   | 2006        | Neil A. Campbell, Brad Williamson, Robin J. Heyden | N/A                                                                                | Textbook         | College               | 1                                    |
| Biology: Guide to the Natural World      | 2005        | David Krogh                                        | N/A                                                                                | Textbook         | College               | 4                                    |
| Biology: The unity and diversity of life | 2001        | Starr Taggart                                      | N/A                                                                                | Textbook         | College               | 28                                   |
| Caterpillar to Butterfly                 | 2012        | Laura Marsh                                        | N/A                                                                                | Trade book       | Pre K through 1st     | 1                                    |
| Classifying                              | 2003        | Andrew                                             | N/A                                                                                | Trade            | 3rd                   | 2                                    |

|                                                                              |      |                                                |                |            |                   |   |
|------------------------------------------------------------------------------|------|------------------------------------------------|----------------|------------|-------------------|---|
| Insects                                                                      |      | Solway                                         |                | book       | through 5th       |   |
| Dictionary of Nature                                                         | 1994 | David Burnie                                   | N/A            | Trade book | 3rd and up        | 3 |
| Discovering Cycles                                                           | 1973 | Glenn O. Blough                                | Jeanne Bendick | Trade book | 3rd through 7th   | 5 |
| Eggs, Legs, Wings: A Butterfly Life Cycle                                    | 2011 | Shannon Barefield                              | Simon Smith    | Trade book | 1st through 3rd   | 2 |
| From Egg to Butterfly                                                        | 2012 | Shannon Zemlicka                               | N/A            | Trade book | K through 3rd     | 0 |
| The Hidden Life of a Toad                                                    | 2017 | Doug Wechsler                                  | N/A            | Trade book | Pre K through 3rd | 0 |
| Insect Lives                                                                 | 1996 | Melvin A. Berger                               | N/A            | Trade book | 2nd through 4th   | 0 |
| It's a Butterfly's Life                                                      | 2007 | Irene Kelly                                    | Irene Kelly    | Trade book | 1st through 2nd   | 1 |
| It's a Hummingbird's Life                                                    | 2003 | Irene Kelly                                    | Irene Kelly    | Trade book | 1st through 3rd   | 1 |
| Kill or Die: Extreme Life Cycles                                             | 2015 | Louise Spilsbury                               | N/A            | Trade book | 4th through 6th   | 1 |
| The Life Cycle of a Spider                                                   | 1989 | Jill Bailey                                    | Jackie Harland | Trade book | K through 4th     | 1 |
| Life: Investigate the Origins of Life and Find out how Living Things Survive | 1999 | David Burnie                                   | N/A            | Trade book | 3rd through 7th   | 2 |
| Life of the Honeybee                                                         | 1986 | Andreas Fischer-Nagel, Heiderose Fischer-Nagel | N/A            | Trade book | 3rd through 4th   | 1 |
| Outside and Inside Kangaroos                                                 | 1999 | Sandra Markle                                  | N/A            | Trade book | 2nd through 3rd   | 0 |

|                              |      |                   |             |            |                   |   |
|------------------------------|------|-------------------|-------------|------------|-------------------|---|
| See How They Grow: Butterfly | 1992 | Mary Ling         | N/A         | Trade book | Pre K through K   | 1 |
| Waiting for Wings            | 2001 | Lois Ehlert       | Lois Ehlert | Trade book | Pre K through 3rd | 0 |
| Watch Me Grow: Ape           | 2006 | Lisa Magloff      | N/A         | Trade book | K through 3rd     | 4 |
| Water Worlds: Fresh Water    | 2001 | Peter Ampt        | N/A         | Trade book | 4th through 6th   | 2 |
| What Bluebirds Do            | 2013 | Pamela F. Kirby   | N/A         | Trade book | K through 2nd     | 0 |
| Wood Duck Baby               | 1983 | Berniece Freschet | Jim Arnosky | Trade book | 1st through 2nd   | 0 |

## Appendix B

### Diagrams that depict metamorphosis

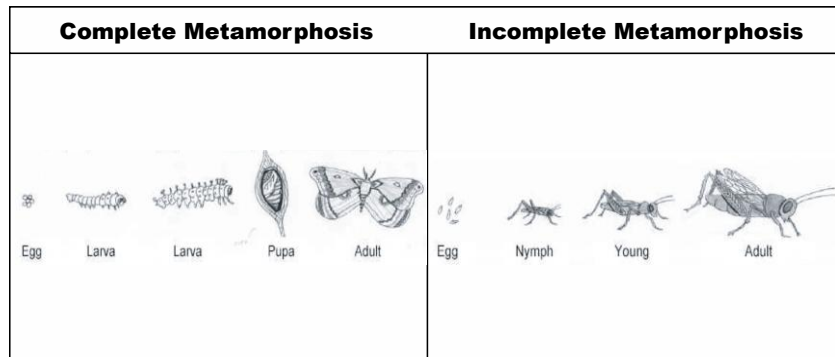

### Diagrams that depict sexual reproduction

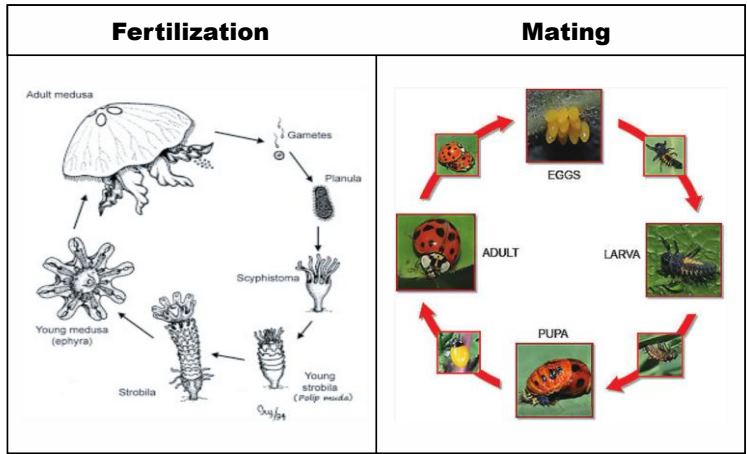

Diagram that depicts death

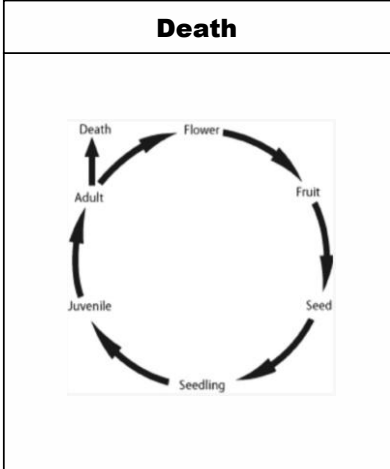

Diagrams that depict a closed (left) and open (right) life cycle

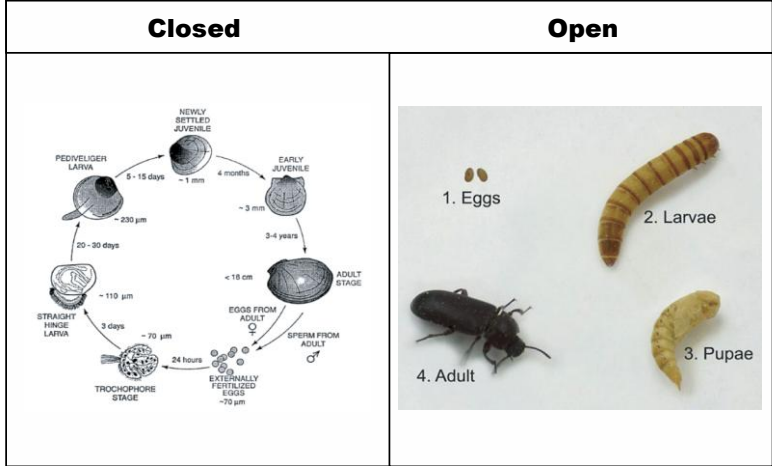

Diagrams that depict a single generation (left) and multiple generations (right)

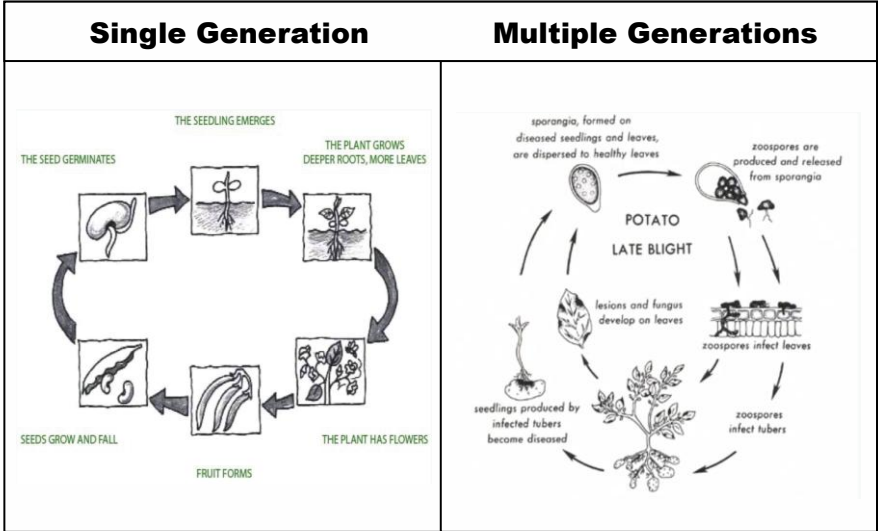

**Diagrams that depict a single zygote (left) and multiple zygotes (right)**

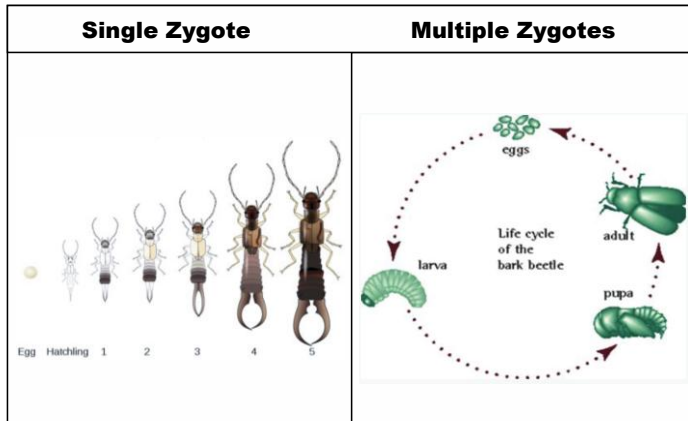

**Diagrams that depict a single species (left) and multiple species (right)**

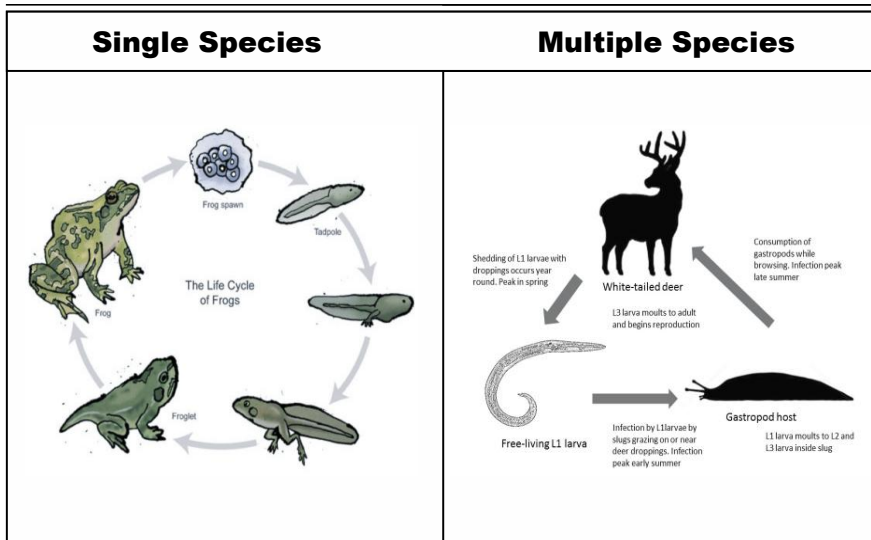

Supplement: combinedsupmats.pdf [file combinedsupmats.pdf]
